# Supplementary material for: Ammonium and nitrate additions differentially affect soil microbial biomass of different communities and enzyme activities in slash pine plantation in subtropical China
Source: Copernicus journal article supplement (doi:10.5194/bg-2017-179), 2017-06-14
Supplement: Supplementary file [file bg-2017-179-SC1-supplement.pdf]

1 **Contrasting effects of ammonium and nitrate additions on the biomass of soil microbial**  
2 **communities and enzyme activities in a slash pine plantation in subtropical China**

3 Chuang Zhang<sup>a,b,c</sup>, Xin-Yu Zhang<sup>b,c</sup>, Hong-Tao Zou<sup>a</sup>, Liang Kou<sup>b</sup>, Yang Yang<sup>b,c</sup>, Xue-Fa Wen<sup>b,c</sup>,  
4 Sheng-Gong Li<sup>b,c</sup>, Hui-Min Wang<sup>b,c</sup>, Xiao-Min Sun<sup>b,c</sup>

5  
6 <sup>a</sup>College of Land and Environment, Shenyang Agricultural University, Shenyang 110866, China;

7 <sup>b</sup>Key Laboratory of Ecosystem Network Observation and Modeling, Institute of Geographic  
8 Sciences and Natural Resources Research, Chinese Academy of Sciences, Beijing 100101, China;

9 <sup>c</sup>College of Resources and Environment, University of Chinese Academy of Sciences Beijing,  
10 100190, China

11 Corresponding author: X. Y. Zhang ([zhangxy@igsrr.ac.cn](mailto:zhangxy@igsrr.ac.cn)), H.T. Zou  
12 ([zouhongtao2001@163.com](mailto:zouhongtao2001@163.com))

13

14 **Abstract**

15

16 The nitrate to ammonium ratios in nitrogen (N) compounds in wet atmospheric deposits have  
17 increased over the recent past, which is a cause for some concern as the individual effects of nitrate and  
18 ammonium deposition on the biomass of different soil microbial communities and enzyme activities are  
19 still poorly defined. We established a field experiment and applied ammonium (NH<sub>4</sub>Cl) and nitrate  
20 (NaNO<sub>3</sub>) at monthly intervals over a period of four years. We collected soil samples from the  
21 ammonium and nitrate treatments and control plots in three different seasons, namely spring, summer,  
22 and autumn, to evaluate the how the biomass of different soil microbial communities and enzyme  
23 activities responded to the ammonium (NH<sub>4</sub>Cl) and nitrate (NaNO<sub>3</sub>) applications. Our results showed  
24 that the total contents of phospholipid fatty acids (PLFA) decreased by 24% and 11% in the ammonium  
25 and nitrate treatments, respectively. The inhibitory effects of ammonium on gram positive bacteria (G<sup>+</sup>)  
26 and bacteria, fungi, actinomycetes, and arbuscular mycorrhizal fungi (AMF) PLFA contents ranged  
27 from 14% to 40% across the three seasons. We also observed that the absolute activities of C, N, and P  
28 hydrolyses and oxidases were inhibited by ammonium and nitrate, but that nitrate had stronger  
29 inhibitory effects on the activities of acid phosphatase (AP) than ammonium. The activities of  
30 N-acquisition specific enzymes (enzyme activities normalized by total PLFA contents) were about 21%

31 and 43% lower in the ammonium and nitrate treatments than in the control, respectively. However, the  
32 activities of P-acquisition specific enzymes were about 19% higher in the ammonium treatment than in  
33 the control. Using redundancy analysis (RDA), we found that the measured C, N, and P hydrolyses and  
34 polyphenol oxidase (PPO) activities were positively correlated with the soil pH and ammonium  
35 contents, but were negatively correlated with the nitrate contents. The PLFA biomarker contents were  
36 positively correlated with soil pH, soil organic carbon (SOC), and total N contents, but were negatively  
37 correlated with the ammonium contents. The soil enzyme activities varied seasonally, and were highest  
38 in March and lowest in October. In contrast, the contents of the microbial PLFA biomarkers were  
39 higher in October than in March and June. Ammonium may inhibit the contents of PLFA biomarkers  
40 more strongly than nitrate because of acidification. This study has provided useful information about  
41 the effects of ammonium and nitrate on soil microbial communities and enzyme activities.

42  
43

#### 44 **1. Introduction**

45

46 Studies have reported increases of 25% in wet atmospheric nitrogen (N) deposition over the past  
47 decade (Jia et al., 2014), which has resulted in a range of problems in forest ecosystems, such as  
48 induced soil acidification, aggravation of cation and nitrate leaching, and decreased microbial biomass  
49 (Liu et al., 2011; Huang et al., 2014; Gao et al., 2015; Liu et al., 2013). While wet atmospheric N  
50 deposition mostly comprises ammonium, nitrate deposition has increased over recent years, so that the  
51 ratio of ammonium to nitrate has decreased from 5 to 2 (Liu et al., 2013). It is therefore important to  
52 study the individual influences of these two forms of N on soil microorganisms to support improved  
53 predictions of C, N, and P cycling under increased nitrate deposition.

54 Soil microorganisms supply nutrients to forests by producing enzymes that catalyze the degradation  
55 of soil organic matter, and drive carbon (C), nitrogen (N), and phosphorus (P) cycling, with  
56 consequences for forest productivity and sustainability (Heijden et al., 2008). The soil microbial  
57 biomass of different communities may be quantified by phospholipid fatty acid (PLFA) biomarkers.  
58 Even though the PLFA signature method is not as advanced as genomic technology, it has been used  
59 extensively with good results to analyze the biomass and structures of microbial communities  
60 (Frostegård et al., 2011). Bacteria, including gram positive ( $G^+$ ) and negative ( $G^-$ ) bacteria, generally

61 degrade labile compounds by excreting hydrolase, while fungi, including arbuscular mycorrhizal fungi  
62 (AMF) and saprophytes (SAP), are responsible for degrading recalcitrant compounds by secreting  
63 oxidase (Burns et al., 2013; Sinsabaugh et al., 2010; Willers et al., 2015).

64 To date, most studies have considered the influence of organic N on microbial communities (Guo et  
65 al., 2010; Hobbie et al., 2012) and few studies have reported how ammonium and nitrate individually  
66 influence microbial communities in forest soils. Positively charged ammonium is more easily absorbed  
67 by negatively charged soil colloids than nitrate, meaning that ammonium is more available to  
68 microorganisms than nitrate. In our previous study, we showed that ammonium promoted the activities  
69 of BG and NAG in soil aggregates were strongly than nitrate (Yan et al., 2017). However, the process  
70 of nitrification, i.e. where ammonium is rapidly transformed to nitrate when it enters soil, may sterilize  
71 microorganisms in the soil (Dail et al., 2001). Ammonium and nitrate have different effects on the  
72 microbial decomposition rate and microbial respiration of soil organic matter. For example, substrate  
73 respiration in peatlands increased when ammonium was added, but did not change when nitrate was  
74 added (Currey et al., 2010). Nitrate additions strongly promoted the decomposition rates of soil organic  
75 matter of fir plantations in the early incubation phase (0–15 d; Zhang et al., 2012). However, from a  
76 laboratory incubation experiment, Ramirez et al. (2010) showed that nitrate and ammonium had similar  
77 inhibitory effects on soil microbial respiration.

78 It is well known that microorganisms and enzymes are sensitive to soil pH. Tian and Niu (2015),  
79 from their meta-analysis of soil acidification caused by N additions, suggested that ammonium nitrate  
80 ( $\text{NH}_4\text{NO}_3$ ) contributed more to soil acidification than ammonium. Further, most studies have not  
81 separated the individual effects of additions of different nitrogen forms on PLFAs and microbial  
82 biomass carbon (MBC) in forest ecosystems. From their meta-analysis, Treseder et al. (2008) reported  
83 that N additions caused MBC to decrease by 15%, and that fungi were more sensitive to N additions  
84 than other microbial communities. The responses of microbial biomass to N additions may be  
85 influenced by a wide range of factors, including forest type and geographical location. For example, in  
86 temperate regions, the total PLFA contents decreased in American beech (*Fagus grandifolia* Ehrh) and  
87 yellow birch (*Betula alleghaniensis* Britton), but increased in eastern hemlock (*Tsuga Canadensis* (L.)  
88 Carr) and red oak (*Quercus rubra* (L.) Britton) forests when  $\text{NH}_4\text{NO}_3$  was added, with variable  
89 responses from bacteria and fungi (Weand et al., 2010). In subtropical forests,  $\text{NH}_4\text{NO}_3$  additions  
90 resulted in an increase in total PLFA contents in a Chinese fir forest (Dong et al., 2015), a decrease in

91 soil MBC contents in an evergreen broad leaved forests, but no change in the pine broad-leaved mixed  
92 forest (Wang et al., 2008).

93 Soil enzymes catalyze the decomposition of soil organic matter (Burns et al., 2013). Enzymes  
94 involved in labile C breakdown that can decompose starch, cellulose, and hemicellulose include  
95  $\alpha$ -1,4-glucosidase ( $\alpha$ G),  $\beta$ -1,4-glucosidase ( $\beta$ G), cellobiohydrolase (CBH), and  $\beta$ -1,4-xylosidase ( $\beta$ X).  
96  $\beta$ -1,4-N-acetylglucosaminidase (NAG), a nitrogen-degradation enzyme, can decompose  
97 oligosaccharides. Acid phosphatase (AP), a phosphorus-degradation enzyme, can decompose chitin  
98 lipophosphoglycan (Stone et al., 2014). Recalcitrant C-degradation enzymes that can decompose lignin,  
99 and aromatic and phenolic compounds including peroxidase and phenol oxidase (Sinsabaugh et al.,  
100 2010). When added to peatland, Currey et al. (2010) found that ammonium and nitrate had different  
101 effects on carbon- and phosphorus-enzyme activities (CBH and AP) but had similar effects on  
102 polyphenol oxidase (PPO) activities, while Tian et al. (2014) found that the effects of ammonium and  
103 nitrate were not significantly different when added to an alpine meadow. To date, few studies have  
104 reported how ammonium and nitrate additions individually influence soil enzyme activities in forest  
105 ecosystems.

106 In line with the economic theory, microorganisms will allocate enzymes to the resources that are  
107 absent, so that N additions will cause C and P-acquisition enzymes to increase, and N-acquisition  
108 enzymes to decrease (Burns et al., 2013). It has been reported that, when inorganic N forms were not  
109 considered, N additions caused C-degradation enzymes ( $\alpha$ G,  $\beta$ G, CBH and  $\beta$ X) and P-degradation  
110 enzymes (AP) to increase, restricted oxidase (PPO and PER), but did not inhibit N-degradation  
111 enzymes (NAG) (Jian et al., 2016; Marklein and Houlton, 2012), which suggests that the allocation of  
112 enzyme activities does not always correspond exactly with the economic theory.

113 The responses of enzyme activities to N additions are influenced by a range of factors including  
114 environmental conditions, plant types, and N background values. For example, in temperate regions,  
115 the soil activities of BG, CBH, NAG, and PPO increased in a dogwood forest, decreased in an oak  
116 forest, and did not change in a maple forest when  $\text{NH}_4\text{NO}_3$  was added. The AP activities increased in  
117 dogwood and maple forests, but were invariant in an oak forest after  $\text{NH}_4\text{NO}_3$  additions (Sinsabaugh et  
118 al., 2002). However, in acidified temperate regions, the soil BG activities increased in a maple forest,  
119 but the soil BG, NAG, and AP activities did not change in yellow birch, oak, hemlock, and beech  
120 forests, when  $\text{NH}_4\text{NO}_3$  was added (Weand et al., 2010). In subtropical and tropical forests, the BG,

121 NAG, and AP activities increased, and oxidase (PPO and PER) activities decreased, after NH<sub>4</sub>NO<sub>3</sub>  
122 additions (Dong et al., 2015; Guo et al., 2011; Cusack et al., 2011). To date, we are still not sure if  
123 ammonium and nitrate additions have different effects on the soil microbial biomass of different  
124 communities and on enzyme activities. To support improved predictions of the effects of elevated N  
125 deposition on C, N, and P cycling in soil, we therefore need to evaluate the individual effects of  
126 ammonium and nitrate additions on the soil microbial biomass of different communities and enzyme  
127 activities.

128 The N-rich subtropical soils in southern China have experienced increased nitrate deposition in the  
129 recent past. To facilitate an exploration of the different effects of ammonium and nitrate additions on  
130 soil microbial communities and enzyme activities, we established a long-term ammonium and nitrate  
131 trial in a slash pine (*Pinus elliottii*) plantation in a subtropical area. We hypothesized that (1)  
132 ammonium would have stronger inhibitory effects on total PLFA, fungi PLFA contents, and enzyme  
133 activities than nitrate because of its strong negative effect on soil pH; and (2) that ammonium and  
134 nitrate additions would result in increased C and P-hydrolase activities, and decreased N-hydrolase  
135 activities in line with the economic theory, and (3) that oxidase activities would be restricted due to  
136 their inhibitory effects on fungi.

137

## 138 **2. Materials and methods**

139

### 140 **2.1. Study site**

141

142 The study was conducted in the Qianyanzhou (QYZ) Experimental Station, in the hilly red soil  
143 region of Taihe County, Jiang Xi Province, China (26°44'29.1"N, 115°03'29.2"E, 102 m a.s.l.). The  
144 region has a subtropical monsoon climate, a mean annual temperature of 17.9 °C, and a mean annual  
145 precipitation of 1475 mm. The soil formed because of weathering of red sandstone and mudstone, and,  
146 based on the US soil taxonomy (Soil Survey Staff, 2010), is classified as a Typical Dystrudepts Udepts  
147 Inceptisol. The slash pine (*Pinus elliottii*), one of the dominant species in this hilly red soil region, was  
148 planted in 1985 under a vegetation restoration program. *Woodwardia japonica*, *Dicranopteris*  
149 *dichotoma* and *Loropetalum chinense* dominate the understory (Kou et al., 2015).

150

151 **2.2. Experimental design**

152

153 As described by Kou et al. (2015), the plots were established in November 2011 using a randomized  
154 complete block design. Background atmospheric wet N deposition of about 33 kg N ha<sup>-1</sup> yr<sup>-1</sup>  
155 comprises 11 kg N ha<sup>-1</sup> yr<sup>-1</sup> as ammonium and 8 kg N ha<sup>-1</sup> yr<sup>-1</sup> as nitrate (Zhu et al., 2014). We  
156 established a control and test plots at the experimental sites. We equally added two types of N to the  
157 test plots, i.e. ammonium (N<sub>ammonium</sub>) as ammonium chloride (NH<sub>4</sub>Cl) and nitrate (N<sub>nitrate</sub>) as sodium  
158 nitrate (NaNO<sub>3</sub>), at an annual rate of 40 kg N ha<sup>-1</sup> yr<sup>-1</sup>. This rate was about double the background N  
159 wet deposition. Each treatment had three replicates, so the experiment comprised a total of nine plots,  
160 which each measured 20 × 20 m. The plots had slope angles of less than 15° and were separated by  
161 buffer zones of more than 10 m. The NH<sub>4</sub>Cl or NaNO<sub>3</sub> were dissolved in 30 L of tap water and evenly  
162 sprayed onto the plots once a month, i.e. 12 times per year. The equivalent amount of tap water was  
163 sprayed onto the control plots. Nitrogen additions commenced in May 2012 and were applied each  
164 month on non-rainy days until March 2015. A total of 113 kg N ha<sup>-1</sup> was applied over the course of this  
165 study.

166

167 **2.3. Sampling and analysis**

168

169 We collected soil samples in March, June, and October of 2015, to represent spring, summer, and  
170 fall. We removed the surface litter, and extracted soil cores with a diameter of 5 cm from between 0  
171 and 10 cm deep from 5 randomly selected locations in each plot, which we then mixed together as one  
172 composite sample. The atmospheric conditions and plant-derived litters differed between the three  
173 seasons, and so indirectly affected the soil microbial biomass and enzyme activities of different  
174 communities. We collected soils from three seasons so that we could investigate the synthetic  
175 responses of soil microbial biomass and enzyme activities to ammonium and nitrate additions and to  
176 obtain improved information to support predictions of the effects of elevated N depositions on C, N,  
177 and P cycling. Field-fresh samples were sieved through a 2 mm mesh after being mixed evenly.  
178 Samples were stored at 4 °C until analysis for PLFA biomarkers, enzyme activities, soil pH,  
179 ammonium, nitrate, and soil dissolved organic carbon (DOC). The PLFA biomarker and enzyme  
180 activity assays were performed on return to the laboratory. Subsamples of each soil were air-dried, and

181 then sieved through a 0.25 mm mesh before soil organic C (SOC) and total N (TN) concentrations were  
182 determined.

183 Soil pH was measured in a soil-water suspension by glass electrode at a soil to water ratio of 1g fresh  
184 soil:2.5 volume of water. Soil water contents (SWC) were measured by the oven drying method  
185 (105 °C). After extraction with 1mol L<sup>-1</sup> KCl, the ammonium and nitrate concentrations in the fresh  
186 soils were measured by a continuous flow auto-analyzer (Bran Lubbe, AA3, Germany). Another  
187 portion of the soil sample was extracted with soil and distilled water at a ratio of 1:5 and soil DOC  
188 concentrations were measured with an organic element analyzer (Liquid TOCII, Elementar, Germany).  
189 Soil TN and SOC were measured with a carbon/nitrogen analyzer (Vario Max, Elementar, Germany).

190 Phospholipid fatty acid (PLFA) biomarkers were measured as outlined by Bossio and Scow (1998).  
191 In brief, field-fresh soil equal to 8 g of dry soil was subjected to mild alkaline methanolysis to form  
192 fatty acid methyl esters (FAMES). The extracted PLFAs were dissolved in hexane and measured by gas  
193 chromatography (Agilent 6890N) with MIDI peak identification software (version 4.5; MIDI Inc.  
194 Newark, DE) and a DB-5 column. The abundances of the PLFA biomarkers were calculated as nmol  
195 PLFA g<sup>-1</sup> dry soil. The total amounts of the different PLFA biomarkers were used to represent different  
196 groups of soil microorganisms, i.e. gram-positive bacteria (G<sup>+</sup>) by i14:0, i15:0, a15:0, i16:0, i17:0,  
197 a17:0; gram-negative bacteria (G<sup>-</sup>) by 16:1 $\omega$ 7c, cy17:0, 18:1 $\omega$ 7c, cy19:0; arbuscular mycorrhizal fungi  
198 (AMF) by 16:1 $\omega$ 5; saprophytic fungi (SAP) by 18:1 $\omega$ 9c, 18:2 $\omega$ 6c, 18:2 $\omega$ 9c 18:3 $\omega$ 6c; actinomycete (A)  
199 by 10Me16:0, 10Me17:0, 10Me18:0 (Bradley et al., 2007; Deneff et al., 2009). Bacterial biomass was  
200 calculated as the sum of G<sup>+</sup> and G<sup>-</sup>, and fungi biomass were calculated as the sum of AMF and SAP,  
201 respectively.

202 We measured four C-acquisition hydrolases (i.e.  $\alpha$ G,  $\beta$ G, CBH, and  $\beta$ X), one N-acquisition  
203 hydrolase (NAG), and one P-acquisition hydrolase (AP) following the methods of Saiya-Cork et al.  
204 (2002), and have provided information about their corresponding substrates and functions in Table S1.  
205 In brief, 1 g of field-fresh soil was homogenized in a sodium acetate buffer (125 ml). We then added  
206 200  $\mu$ l of homogenate and 50  $\mu$ l of substrate to black microplates with 96 wells with eight replicates for  
207 each soil sample. The microplates were then incubated at 20 °C for 4 h. After incubation, 10  $\mu$ l of 1 mol  
208 L<sup>-1</sup> NaOH was added to each well to terminate the reactions, and fluorescence values were measured at  
209 an excitation of 365 nm and emission of 450 nm with a microplate fluorometer (Synergy H4, BioTek).  
210 The absolute hydrolase activities were expressed in units of nmol g<sup>-1</sup> soil h<sup>-1</sup>. We compared the

211 stoichiometry of C and P to N-acquisition enzyme activities by  $\ln(aG+BG+CBH+BX)$  and  $\ln aP$  to  
212  $\ln NAG$ , respectively (n=27).

213 Two oxidases, i.e. PER and PPO, were measured using 96-well transparent microplates as outlined  
214 by Saiya-Cork et al. (2002). We added 600  $\mu$ l of homogenate and 150  $\mu$ l of substrate to deep  
215 microplates with 96 wells. To measure the PER activities, we added 10  $\mu$ l of 0.3%  $H_2O_2$  to the  
216 homogenate and substrates mixtures. After incubation at 20 °C for 5 h, the microplates were  
217 centrifuged at 3000 r for 3 minutes, then 250  $\mu$ l of liquid supernatant was transferred to a 96-well  
218 transparent microplate. The absorbance values were measured at 460 nm by microplate  
219 spectrophotometer (Synergy H4, BioTek). We calculated the specific activities of the enzymes by  
220 dividing the enzyme activities by the PLFA values to normalize the activity to the size of the microbial  
221 active biomass (Cusack et al. 2011).

222

## 223 **2.4. Statistical analyses**

224

225 We used a two factor randomized block analysis of variance and Duncan's multiple comparisons to  
226 test the differences between the treatments and sampling time (n=9). To evaluate the effects of  
227 ammonium and nitrate additions, the treatment differences of time-dependent indexes were tested by  
228 one-way analysis of variance (ANOVA) and Duncan's multiple comparisons for each sampling event or  
229 season (n=3). Analyses were performed with SPSS 17.0. Relationships among the soil physical and  
230 chemical properties, soil PLFA biomarker contents, and the soil enzyme activities were tested by  
231 redundancy analysis (RDA) in CANOCO 4.5 (n=27). Results were statistically significant when  $P <$   
232 0.05. The figures were plotted in Sigmaplot 10.0.

233

## 234 **3. Results**

235

### 236 **3.1. Soil physical and chemical properties**

237

238 The soil pH and ammonium contents were either treatment- or time-independent. There were  
239 interaction effects between the treatments and the sampling time on the soil DOC and nitrate contents  
240 ( $P < 0.01$ , Table 1). The soil pH decreased by 0.7 of a unit across the three sampling events in the



241 ammonium-treated plots, but did not change significantly in the nitrate-treated plots (Fig. 1). The soil  
242 nitrate contents were 165% and 129% higher, and the soil ammonium contents were 31% and 38%  
243 lower, respectively, in the ammonium and nitrate treatments (Fig. 1 & 2) than in the control for the  
244 three sampling events. Compared with the control, the soil DOC concentrations were 17% higher in the  
245 nitrate-treated plots across the three sampling events, but did not change significantly in the  
246 ammonium-treated plots (Fig. 2). Ammonium contents were higher in March than in June and October  
247 (Fig. 2, Table S2), while DOC and nitrate concentrations were highest in October and lowest in March  
248 (Table 2).

249

### 250 **3.2. Soil microbial biomass of different communities**

251

252 Both the treatment and the time of sampling significantly influenced the soil microbial biomass of  
253 the different communities ( $P < 0.01$ ). Total PLFAs, bacteria,  $G^-$ , and  $G^+/G^-$  were either treatment- or  
254 time-independent. There were also interaction effects between treatments and sampling time on fungi,  
255 actinomycetes,  $G^+$ , AMF, SAP, and the fungi/bacteria ratio (Table 1). The inhibition effects of  
256 ammonium additions on total PLFA contents were stronger than those of nitrate additions and the total  
257 PLFA contents were 24% and 11% less in the ammonium- and nitrate-treated plots across the three  
258 sampling events than in the control. The PLFA contents of  $G^+$ , AMF, bacteria, fungi, actinomycetes  
259 were between 14% and 40%, and 7% and 24%, lower in the plots treated with ammonium and nitrate,  
260 respectively, than in the control across the three sampling events (Fig. 3 and 4). The soil PLFA contents  
261 also showed seasonal variation (Table 1). Total PLFA biomarker contents and bacterium, fungi,  $G^+$ ,  $G^-$ ,  
262 AMF, and SAP PLFA biomarker contents were highest in March and lowest in October, while  
263 actinomycete PLFA biomarker contents were highest in June and lowest in October (Fig. 4, Table S2).

264 The microbial communities shifted from  $G^-$  to  $G^+$  in the ammonium-treated plots, meaning that the  
265  $G^+/G^-$  ratios were higher in the ammonium-treated plots than in the control or nitrate-treated plots. The  
266 fungi/bacteria ratios were lower in both the ammonium- and nitrate-treated plots than in the control, but  
267 were much lower in the nitrate-treated plots than in the ammonium-treated plots (Figs. 3 and 4).

268

### 269 **3.3. Soil enzyme activities**

270

271 There were significant influences from both treatment and sampling time on the measured absolute  
272 enzyme activities ( $P < 0.01$ ). Activities of BG, AP, and PPO were either treatment- or time-independent,  
273 and there were interaction effects between the treatments and sampling time on activities of aG, BX,  
274 CBH, NAG, and PER (Table 1). Ammonium and nitrate had similar inhibition effects on aG, BG, BX,  
275 CBH, NAG, PPO, and PER activities, which decreased by between 6% and 50% across the three  
276 sampling events (Table 2). The AP absolute activities were about 9% lower in the nitrate treatment than  
277 in the ammonium treatment (Table 2). When compared to control, the ratios of C to N-acquisition  
278 enzyme activities were about 0.2 higher, the ratios of N to P acquisition enzyme activities were about  
279 0.1 lower, and there were no obvious differences in the ratios of C to P acquisition enzyme activities in  
280 the ammonium and nitrate treatments. The measured enzyme activities varied seasonally (Table 2).  
281 Activities of BG, BX, CBH, NAG, AP, and PPO were lowest in March and highest in October; aG  
282 activities were highest in March and lowest in June, and PER activities were highest in March and  
283 lowest in October (Table 2).

284 The treatments had a significant influence on the activities of N- and P-acquisition specific enzymes  
285 ( $P < 0.01$ ), but not on the activities of C and oxidase specific enzymes (Table 1). The inhibitory effects  
286 of nitrate on the activities of N-acquisition specific enzymes were stronger (about 43%) than those of  
287 ammonium (about 21%). When compared with the control, the AP specific activities were about 19%  
288 higher in the ammonium-treated plots across the three sampling events (Fig. 5).

289

#### 290 **3.4. Redundancy analyses**

291

292 The results of RDA between soil properties, absolute enzyme activities, and PLFA biomarker  
293 contents showed that the first ordination RDA axis explained 72.0% and 67.5%, respectively, and the  
294 second axis explained 11.5% and 14.3%, respectively, of the variation. The RD1 for soil absolute  
295 enzyme activities and PLFA biomarkers was correlated with DOC/SOC, DOC, ammonium, and SOC.  
296 However, nitrate was only correlated with the RD1 of the absolute enzyme activities but not the PLFA  
297 biomarker contents. Most of the measured absolute soil enzyme activities and the PLFA biomarker  
298 contents were positively correlated with soil pH, but  $G^+/G^-$  and F/B were negatively correlated with  
299 soil pH. Ammonium and DOC contents were positively correlated with all the soil absolute enzyme  
300 activities except PER, but were negatively correlated with PLFA biomarker contents. Nitrate contents

301 were negatively correlated with soil absolute enzyme activities, but were barely correlated with the  
302 PLFA biomarker contents. SWC were positively correlated with soil PLFA biomarker contents, but  
303 were not correlated with the absolute enzyme activities (Fig. 6).

304

#### 305 **4. Discussion**

306

307 Our results agree with our first hypothesis and show that the inhibition effects on soil PLFA contents  
308 of bacteria, fungi, and actinomycetes across the three sampling events or seasons were stronger when  
309 ammonium was added than when nitrate was added (Figures 3 and 4, Table 1). Results from RDA  
310 suggest that acidification because of the ammonium additions triggered the decrease in the microbial  
311 biomarkers-PLFA contents (Fig. 6). Soil microbial biomass may be inhibited by resource availability  
312 and acidification (Sinsabaugh et al., 2014; Moorhead et al., 2006). However, C and N availability (sum  
313 of the ammonium and nitrate concentrations) either increased or stayed the same over the three  
314 sampling events when ammonium and nitrate were added (Figs. 1 and 2). Ammonium additions may  
315 aggravate nitrification in subtropical soils (Tang et al. 2016), and nitrification may be toxic to  
316 microorganisms (Dail et al., 2001), which may then lead to a decrease in the microbial PLFA contents.

317 The soil pH did not change when nitrate was added (Fig. 1), which may explain why nitrate had  
318 weaker inhibition effects on PLFA biomarker contents than ammonium. Nitrate additions may inhibit  
319 the PLFA biomarker contents because of accelerated leaching of  $\text{Ca}^{2+}$  and  $\text{Mg}^{2+}$  (Qian et al., 2007),  
320 increases in the soil osmotic potential, and activation of  $\text{Al}^{3+}$  absorbed by soil colloids (Treseder et al.,  
321 2008). The PER activity was lower when ammonium and nitrate were added (Table 2), which may  
322 eventually result in polyphenol accumulation in soil. Accumulated polyphenol may be toxic to  
323 microorganisms (Sinsabaugh et al., 2010) and may have contributed to the decrease in the contents of  
324 the PLFA biomarkers. Moreover, the higher soil DOC concentrations observed in the nitrate-addition  
325 treatments (Fig. 2) may be attributed to changes in the diversity of the composition of saprophytic  
326 bacteria (Freedman and Zak, 2014; Freedman et al., 2016).

327 In our study, the fungi /bacteria ratios were lower in the ammonium and nitrate treatments than in the  
328 control, which suggests that fungi were more sensitive to N additions than bacteria. In an earlier study,  
329 we found that the fine root biomass decreased after N additions (Kou et al., 2015), which suggests that  
330 N might upset the symbiosis between AMF and plants, thereby restricting the AMF-PLFA contents.

331 Our study showed that the absolute activities of C, N, and P-hydrolases and oxidase were inhibited  
332 by ammonium and nitrate in the three seasons (Table 2). This agrees with our second and third  
333 hypothesis, i.e., that N additions caused the absolute activities of the N-acquisition enzyme (NAG) to  
334 decrease, in line with the microbial economic theory; and that N additions reduced the absolute  
335 activities of the oxidase by decreasing the PLFA contents of fungi. However, we did not expect the C-  
336 or P-acquisition enzymes to decrease. As main producers of soil enzymes, the microbial biomass would  
337 decrease in response to ammonium and nitrate additions, resulting in lower absolute enzyme activities  
338 in the treated plots than in untreated plots (Allison et al., 2005).

339 The ratios of C or P to N acquisition enzyme activities were higher in the ammonium and nitrate  
340 treatments than in the control plots, and the N-acquisition enzyme activities per unit of microbial  
341 biomass were lower in the ammonium and nitrate treatments than in the control (Fig. 5), indicating that  
342 microorganisms secreted enzymes in line with the economic theory. Measured absolute enzyme  
343 activities were positively correlated with soil pH and ammonium contents, and negatively correlated  
344 with nitrate contents (Fig. 6). The inhibitory effects of N on the soil absolute enzyme activities may be  
345 more closely related to abiotic factors, i.e. soil pH and nitrification, than biotic factors (Kivlin et al.,  
346 2016).

347 We also found that ammonium and nitrate additions inhibited AP activities (Table 2). However,  
348 P-acquisition enzyme activities per unit of microbial biomass increased in the ammonium treatments  
349 (Fig. 5). Li et al. (2016) reported that N applications aggravated the P-limitations on biomass  
350 production (Li et al., 2016). In line with the microbial economic theory, when the P-availability was  
351 low, the activities of P-acquisition enzymes were higher. The decreased AP activities that resulted from  
352 ammonium additions may be more strongly related to abiotic inhibition caused by the ammonium, such  
353 as acidification, aggravated nitrification, and leaching of cations and nitrate, than biotic inhibition.

354 The N treatments also varied significantly on a seasonal basis and there were interaction effects  
355 between N treatments and seasons on the contents of some PLFA biomarkers and enzyme activities  
356 (Table 2). Climate conditions, plant growth, the amount of litter returned, and plant-soil-microorganism  
357 systems varied across the three seasons. The temperature ranged from 13.5 to 27.6 °C, and precipitation  
358 ranged from 88.2 to 176.6 mm, across the three seasons (Fig. S1), and did not limit the growth of  
359 microorganisms. The positive relationships between PLFA biomarker contents and soil moisture  
360 contents indicate that soil moisture had a strong influence on soil microbial community biomass. There

361 may be interaction effects between plant growth, the mass and quality of litter, plant-microbe  
362 competition, and soil nutrient dynamics. For example, compared with the control plots, the soil DOC  
363 contents were lower, and soil nitrate contents stayed the same in June (the growing season) in the  
364 ammonium treatment, but the soil DOC and nitrate contents were higher in the ammonium and nitrate  
365 treatments in March and October (non-growing season, Fig. 2). This indicates that there was stronger  
366 competition between plants and microbes for available C and N in June than in March and October, and  
367 that there were interaction effects between plants and microbes on soil C and N availability. This might  
368 explain the interaction effects between N additions and seasons on the activities of C and N-acquisition  
369 enzymes. The effects of interactions between N additions and season on the AMF PLFA contents,  
370 along with available C and N dynamics, may result from plant growth as plant-AMF symbiotic systems  
371 may be influenced by fine root biomass.

372

## 373 **5. Conclusions**

374

375 The results showed that soil bacteria, fungi, and actinomycetes- PLFA biomarker contents decreased  
376 after ammonium and nitrate additions. Ammonium inhibited the biomass of different soil microbial  
377 communities except SAP more strongly than nitrate, perhaps because of acidification caused by  
378 ammonium. The microbial communities were dominated by G<sup>+</sup> and bacteria after ammonium additions,  
379 and were dominated by bacteria under nitrate additions.

380 The absolute activities of C, N, and P-acquisition hydrolases and oxidase decreased after additions of  
381 ammonium and nitrate, and nitrate had a stronger inhibition effects on P-acquisition absolute enzyme  
382 activities than ammonium. However, ammonium improved the P-demand per unit of microbial biomass.  
383 C and P-acquisition absolute enzyme activities were higher than N-acquisition absolute enzyme  
384 activities under ammonium and nitrate additions. Because of the positive correlation between the  
385 measured absolute enzyme activities and soil pH, the decreases in the absolute hydrolase and oxidase  
386 activities reflected abiotic restrictions, i.e. acidification and nitrification caused by ammonium  
387 additions, rather than biotic restrictions.

388 Ammonium and nitrate additions had a range of effects on soil microbial communities and the  
389 activities of specific enzymes. Our results show that the effects of ammonium and nitrate need to be  
390 discussed separately to provide the information that we need to predict the effects of elevated N

391 deposition on soil microbial biomass and enzyme activities.

392

393 *Author contribution:* Xin-yu Zhang, Xue-Fa Wen, Sheng-Gong Li, Hui-Min Wang, and Xiao-Min Sun  
394 designed the research; Chuang Zhang, Liang Kou, and Yang Yang performed the study and analyzed  
395 data; and Chuang Zhang, Xin-yu Zhang and Hong-tao Zou wrote the paper.

396

397 *Competing interests:* The authors declare no conflict of interest.

398

399 *Acknowledgments*

400

401 This study was jointly financed by the General, State Key and Major Programs of National Natural  
402 Science Foundation of China (Nos. 41571251, 41571130043, 31130009)

403

#### 404 **References**

405

406 Allison S. D., and Vitousek P. M.: Response of extracellular enzymes to simple and complex nutrient  
407 inputs. *Soil Biology and Biochemistry*, 37, 937-943, doi: 10.1016/j.soilbio.2004.09.014, 2005.

408 Burns R. G., DeForest J. L., Marxsen J., Sinsabaugh R. L., Stromberger M. E., Wallenstein M. D.,  
409 Weintraub M. N., and Zoppini A.: Soil enzymes in a changing environment: Current knowledge  
410 and future directions. *Soil Biology and Biochemistry*, 58, 216-227, doi:  
411 org/10.1016/j.soilbio.2012.11.009, 2013.

412 Cusack D. F., Silver W. L., Torn M. S., Burton S. D., and Firestone M. K.: Changes in microbial  
413 communities characteristics and soil organic matter with nitrogen additions in two tropical forests.  
414 *Ecology*, 92, 621-630, doi: 10.1890/10-0459.1, 2011.

415 Dail D. B., Davidson E. A., and Chorover J.: Rapid abiotic transformation of nitrate in an acid forest  
416 soil. *Biogeochemistry*, 54, 131-143, doi: 10.1023/A:1010627431722, 2001.

417 Dong W. Y., Zhang X. Y., Liu X. Y., Fu X. L., Chen F. S., Wang H. M., Sun X. M., and Wen X. F.:  
418 Responses of soil microbial communities and enzyme activities to nitrogen and phosphorus  
419 additions in Chinese fir plantations of subtropical China. *Biogeosciences*, 12, 5540-5544, doi:  
420 10.5194/bg-12-5537-2015, 2015.

421 Freedman Z., and Zak D. R.: Atmospheric N Deposition Increases Bacterial Laccase-Like Multicopper  
422 Oxidases: Implications for Organic Matter Decay. *Applied and Environmental Microbiology*, 80:  
423 4460-4468, doi: [org/10.1128/AEM.01224-14](https://doi.org/10.1128/AEM.01224-14), 2014.

424 Freedman Z. B, Upchurch R. A, Zak D. R., and Cline L C.: Anthropogenic N Deposition Slows Decay  
425 by Favoring Bacterial Metabolism: Insights from Metagenomic Analyses. *Frontiers in*  
426 *Microbiology*, 7: 1-11, doi: [10.3389/fmicb.2016.00259](https://doi.org/10.3389/fmicb.2016.00259), 2016.

427 Frostegård A., Tunlid A., and Bååth E.: Use and misuse of PLFA measurements in soils. *Soil Biology*  
428 *and Biochemistry*, 43, 1621–1625, doi: [org/10.1016/j.soilbio.2010.11.021](https://doi.org/10.1016/j.soilbio.2010.11.021), 2011.

429 Gao W. L., Yang H., Kou L., and Li S. G.: Effects of nitrogen deposition and fertilization on N  
430 transformations in forest soils: a review. *Journal of Soil and Sediments*, 15, 863–875, doi:  
431 [10.1007/s11368-015-1087-5](https://doi.org/10.1007/s11368-015-1087-5), 2015.

432 Guo P., Wang C. Y., Jia Y., Wang Q., Han G. M., and Tian X. J.: Response of soil microbial biomass and  
433 enzymatic activities to fertilizations of mixed inorganic and organic nitrogen at a subtropical forest  
434 in East China. *Plant and soil*, 338, 357-361, doi: [10.1007/s11104-010-0550-8](https://doi.org/10.1007/s11104-010-0550-8), 2011.

435 Heijden M. G. A. V. D., Bardgett R. D., and Straalen N. M. V.: The unseen majority: soil microbes as  
436 drivers of plant diversity and productivity in terrestrial ecosystems. *Ecology letters*, 11, 296-310,  
437 doi: [10.1111/j.1461-0248.2007.01139.x](https://doi.org/10.1111/j.1461-0248.2007.01139.x), 2008.

438 Hobbie S. E., Eddy W. C., Buyarski C. R., Adair C. A., Ogdahl M. L., and Weisenhorn P.: Response of  
439 decomposing litter and its microbial community to multiple forms of nitrogen enrichment.  
440 *Ecological Monographs*, 82, 389–405, doi: [10.1890/11-1600.1](https://doi.org/10.1890/11-1600.1), 2012.

441 Huang J., Mo J. M., Zhang W., and Lu X. K.: Research on acidification in forest soil driven by  
442 atmospheric nitrogen deposition. *Acta Ecologica Sinica*, 34, 304-306, doi:  
443 [org/10.1016/j.chnaes.2014.10.002](https://doi.org/10.1016/j.chnaes.2014.10.002), 2014.

444 Jia Y. L., Yu G. R., He N. P., Zhan X. Y., Fang H. J., Sheng W. P., Zuo Y., Zhang D. Y., and Wang Q. F.:  
445 Spatial and decadal variations in inorganic nitrogen wet deposition in China induced by human  
446 activities. *Scientific reports*, 4. 1-3, doi: [10.1038/srep03763](https://doi.org/10.1038/srep03763), 2014.

447 Jian S. Y., Li J. W., Chen J., Wang G. S., Mayes M. A., Dzantor K. E., Hui D. F., and Luo Y. Q.: Soil  
448 extracellular enzyme activities, soil carbon and nitrogen storage under nitrogen fertilization: A  
449 meta-analysis. *Soil Biology and Biochemistry*, 101, 32-41, doi: [org/10.1016/j.soilbio.2016.07.003](https://doi.org/10.1016/j.soilbio.2016.07.003),  
450 2016.

451 Kivlin S. N, and Treseder K. K.: Soil extracellular enzyme activities correspond with abiotic factors  
452 more than fungal community composition. *Biogeochemistry*, 117, 24-34, doi:  
453 10.1007/s10533-013-9852-2, 2014.

454 Kou L., Chen W. W., Zhang X. Y., Gao W. L., Yang H., Li D. D, and Li S. G.: Differential responses of  
455 needle and branch order-based root decay to nitrogen additions: dominant effects of  
456 acid-unhydrolyzable residue and microbial enzymes. *Plant and Soil*, 394, 318-319,  
457 doi:10.1007/s11104-015-2517-2, 2015.

458 Kou L., Guo D. L., Yang H., Gao W. L., and Li S. G.: Growth, morphological traits and mycorrhizal  
459 colonization of fine roots respond differently to nitrogen addition in a slash pine plantation in  
460 subtropical China. *Plant and Soil*, 391, 207-218, doi:10.1007/s11104-015-2420-x, 2015.

461 Li Y., Niu S. L., and Yu G. R.: Aggravated phosphorus limitation on biomass production under  
462 increasing nitrogen loading: a meta -analysis. *Global Change Biology*, 22, 934-943, doi:  
463 10.1111/gcb.13125, 2016.

464 Liu X. J., Duan L., Mo J. M., Du E. Z., Shen J. L., Lu X. K., Zhang Y., Zhou X. B., He C. N., and  
465 Zhang F. S.: Nitrogen deposition and its ecological impact in China: An overview. *Environmental*  
466 *Pollution*, 159, 2253-2254, doi: org/10.1016/j.envpol.2010.08.002, 2011.

467 Liu X. J., Zhang Y., Han W. H., Tang A., Shen J. L., Cui Z. L., Vitousek P., Erismann J. W., Goulding K.,  
468 Christie P., Fangmeier A., and Zhang F.: Enhanced nitrogen deposition over China. *Nature*, 494,  
469 459-462, doi:10.1038/nature11917, 2013.

470 Marklein A. R., and Houlton B. Z.: Nitrogen inputs accelerate phosphorus cycling rates across a wide  
471 variety of terrestrial ecosystems. *New Phytologist*, 193, 696-702, doi:  
472 10.1111/j.1469-8137.2011.03967.x, 2012.

473 Moorhead D. L., and Sinsabaugh R. L.: A theoretical model of litter decay and microbial interaction.  
474 *Ecological Monographs*, 76, 151-172, doi: 10.1890/ 0012 -9615, 2006.

475 Paulinem, C., David, J., Lucyj, S., Iand, L., Hannah, T., Ren é V. D., Lorna A. D and Rebekka R. E A.:  
476 Turnover of labile and recalcitrant soil carbon differ in response to nitrate and ammonium  
477 deposition in an ombrotrophic peatland. *Global Change Biology*, 16, 2307-2321, doi:  
478 10.1111/j.1365-2486.2009.02082.x, 2010.

479 Qian C., and Cai Z. C.: Leaching of nitrogen from subtropical soils as affected by nitrification potential  
480 and base cations. *Plant and Soil*, 300, 199-204, doi:10.1007/s11104-007-9404-4, 2007.



481 Ramirez K. S., Craine J. M., and Fierer N.: Nitrogen fertilization inhibits soil microbial respiration  
482 regardless of the form of nitrogen applied. *Soil Biology and Biochemistry*, 42, 2336-2338, doi:  
483 org/10.1016/j.soilbio.2010.08.032. 2010.

484 Saiya-Cork K. R., Sinsabaugh R. L., and Zak D. R.: The effects of long term nitrogen deposition on  
485 extracellular enzyme activities in an *Acer saccharum* forest soil. *Soil Biology and Biochemistry*,  
486 34, 1309–1314, doi: org/10.1016/S0038-0717(02)00074-3, 2002.

487 Sinsabaugh R. L.: Phenol oxidase, peroxidase and organic matter dynamics of soil. *Soil Biology and*  
488 *Biochemistry*, 24, 391-401, doi: org/10.1016/j.soilbio.2009.10.014, 2010.

489 Sinsabaugh R. L., Belnap J., Findlay S. G., Follstad Shah J. J., Hill B. H., Kuehn K. A., Kushe C. R.,  
490 Litvak M. E., Martinez N. G., Moorhead D. L., and Warnock D. D.: Extracellular enzyme kinetics  
491 scale with resource availability. *Biogeochemistry*, 121, 287-301, doi:10.1007/s10533-014-0030-y,  
492 2014.

493 Sinsabaugh R. L., Carreiro M. M., and Repert D. A.: Allocation of extracellular enzymatic activities in  
494 relation to litter composition, N deposition, and mass loss. *Biogeochemistry*, 60, 6–22, doi:  
495 10.1023/A:1016541114786, 2002.

496 Soil Survey Staff, 2010. *Keys to Soil Taxonomy*, 11th ed. USDA Natural Resources Conservation  
497 Service, Washington, DC.

498 Stone M. M., DeForest J. L., and Plante A. F.: Changes in extracellular enzyme activity and microbial  
499 community structure with soil depth at the Luquillo Critical Zone Observatory. *Soil Biology and*  
500 *Biochemistry*, 75, 240-241, doi: org/10.1016/j.soilbio.2014.04.017, 2014.

501 Tang Y. Q., Zhang X. Y., Li D. D., Wang H. M., Chen F. S., Fu X. L., Fang J. M., Sun X. M., and Yu G.  
502 R.: Impacts of nitrogen and phosphorus additions on the abundance and community structure of  
503 ammonia oxidizers and denitrifying bacteria in Chinese fir plantations. *Soil Biology and*  
504 *Biochemistry*, 103, 284-293, doi: org/10.1016/j.soilbio.2016.09.001, 2016.

505 Tian D., and Niu S.: A global analysis of soil acidification caused by nitrogen addition. *Environmental*  
506 *Research Letters*, 10, doi: 10.1088/1748-9326/10/2/024019, 2015.

507 Tian X. F., Hu H. W., Ding Q., Song M. H., Xu X. L., Zheng Y., and Guo L. D.: Influence of nitrogen  
508 fertilization on soil ammonia oxidizer and denitrifier abundance, microbial biomass, and enzyme  
509 activities in an alpine meadow. *Biology and Fertility of Soils*, 50, 703-713, doi:  
510 10.1007/s00374-013-0889-0, 2014.

511 Treseder K. K.: Nitrogen additions and microbial biomass: a meta-analysis of ecosystem studies.  
512 Ecology Letters, 11, 1114-1118, doi: 10.1111/j.1461-0248.2008.01230.x, 2008.

513 Wang H., Mo J. M., Lu X. K., Xue J. H., Li J., and Fang Y. T.: Effects of elevated nitrogen deposition  
514 on soil microbial biomass carbon in major subtropical forests of southern China. Acta Ecologica  
515 Sinica, 4, 21-27, doi:10.1007/s11461-009-0013-7, 2008.

516 Weand M. P., Arthur M. A., Lovett G. M., McCulley R. L., and Weathers K. C.: Effect of tree species  
517 and N additions on forest floor microbial communities and extracellular enzyme activities. Soil  
518 Biology and Biochemistry, 42, 2161-2171, doi: org/10.1016/j.soilbio.2010.08.012, 2010.

519 Wei Y., Wang Z. Q., Zhang X. Y., Yang H., Liu X. Y., and Liu W. J.: Enzyme activities and microbial  
520 communities in subtropical forest soil aggregates to Ammonium and Nitrate-Nitrogen additions.  
521 Journal of Resources and Ecology, 8, 258-267, doi: 10.5814/j.issn.1674-764x.2017.03.006, 2017.

522 Willers C., Jansen van Rensburg P. J., and Claassens S.: Phospholipid fatty acid profiling of microbial  
523 communities—a review of interpretations and recent applications. Journal of Applied Microbiology,  
524 119, 1207-1213, doi:10.1111/jam.12902, 2015.

525 Zhang W. D., and Wang S. L.: Effects of  $\text{NH}_4^+$  and  $\text{NO}_3^-$  on litter and soil organic carbon decomposition  
526 in a Chinese fir plantation forest in South China. Soil Biology and Biochemistry, 47, 116-121, doi:  
527 org/10.1016/j.soilbio.2011.12.004, 2012.

528 Zhu J. X., He N. P., Wang Q. F., Yuan G. F., Wen D., Yu G. R., and Jia Y. L.: The composition, spatial  
529 patterns, and influencing factors of atmospheric wet nitrogen deposition in Chinese terrestrial  
530 ecosystems. Science of the Total Environment, 511, 777-784, doi: org/ 10.1016/ j.scitotenv.2014.  
531 12. 038, 2015.

532 **Figure Legends**

533

534 **Fig. 1.** The effects of ammonium and nitrate additions on soil pH and ammonium contents. Small  
535 letters represent significant differences between treatments ( $P < 0.05$ ), error bars represent means  $\pm$   
536 standard errors (n=9).

537 **Fig. 2.** The effects of ammonium and nitrate additions on soil nitrate and DOC contents for each  
538 sampling event. Capital letters represent significant differences between the treatments ( $P < 0.05$ ), and  
539 small letters represent significant differences between the sampling events ( $P < 0.05$ ), error bars  
540 represent means  $\pm$  standard errors (n=3).

541 **Fig. 3.** The effects of ammonium and nitrate additions on Total PLFAs, PLFA contents of bacteria, G<sup>-</sup>  
542 and G<sup>+</sup>/G<sup>-</sup>. Small letters represent significant differences between treatments ( $P < 0.05$ ), error bars  
543 represent means  $\pm$  standard errors (n=9). G<sup>+</sup> represents gram positive bacteria and G<sup>-</sup> represents gram  
544 negative bacteria.

545 **Fig. 4.** The effects of ammonium and nitrate additions on PLFA contents of fungi, actinomycetes, AMF,  
546 SAP, G<sup>+</sup>, and fungi/bacteria ratio for each sampling event. Capital letters represent significant  
547 differences between the treatments ( $P < 0.05$ ), and small letters represent significant differences  
548 between the sampling time ( $P < 0.05$ ), error bars represent means  $\pm$  standard errors (n=3). G<sup>+</sup> is gram  
549 positive bacteria, AMF is arbuscular mycorrhizal fungi, and SAP is saprophytic fungi.

550 **Fig. 5.** The effects of ammonium and nitrate additions on N, P-acquisition specific enzyme activities  
551 for each sampling event. Capital letters represent significant differences between the treatments ( $P$   
552  $< 0.05$ ), and small letters represent significant differences between the sampling time ( $P < 0.05$ ), error  
553 bars represent means  $\pm$  standard errors (n=3).

554 **Fig. 6.** Redundancy analyses between (a) soil properties and enzyme activities, and (b) soil properties  
555 and PLFA-biomarker contents.

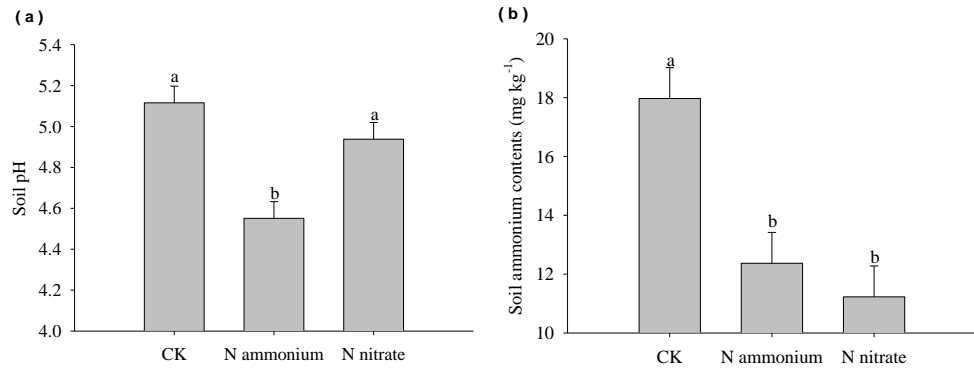

556

557 **Fig.1**

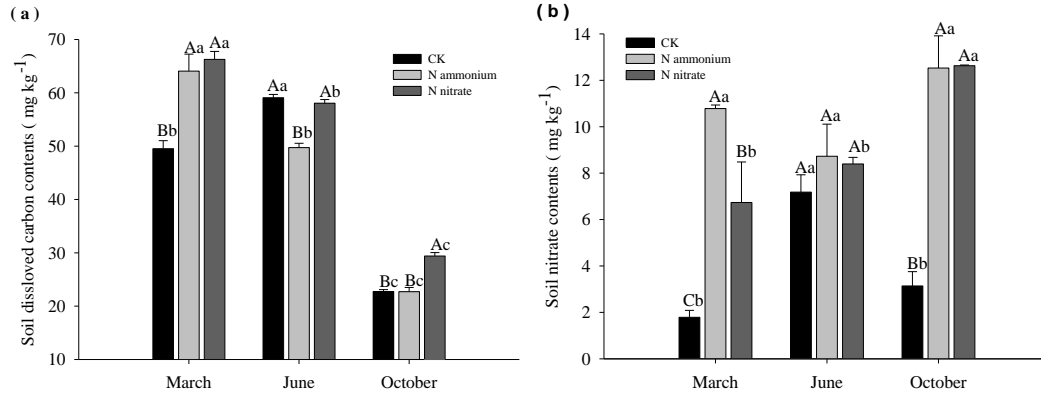

558

559

**Fig.2**

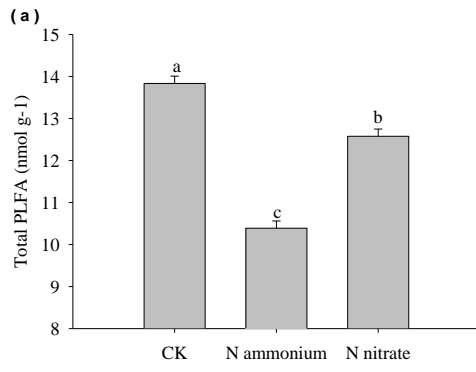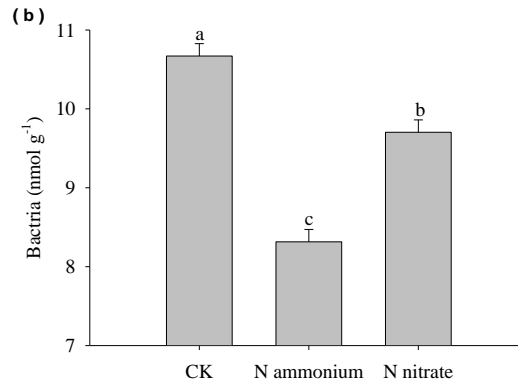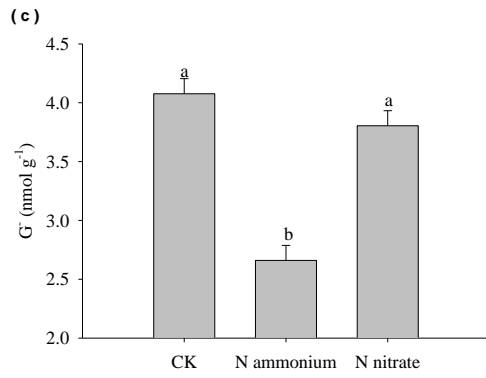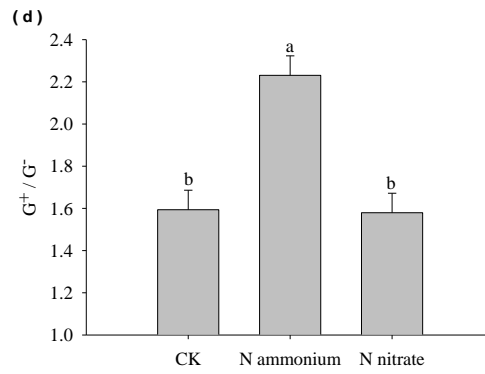

560

561

562

**Fig.3**

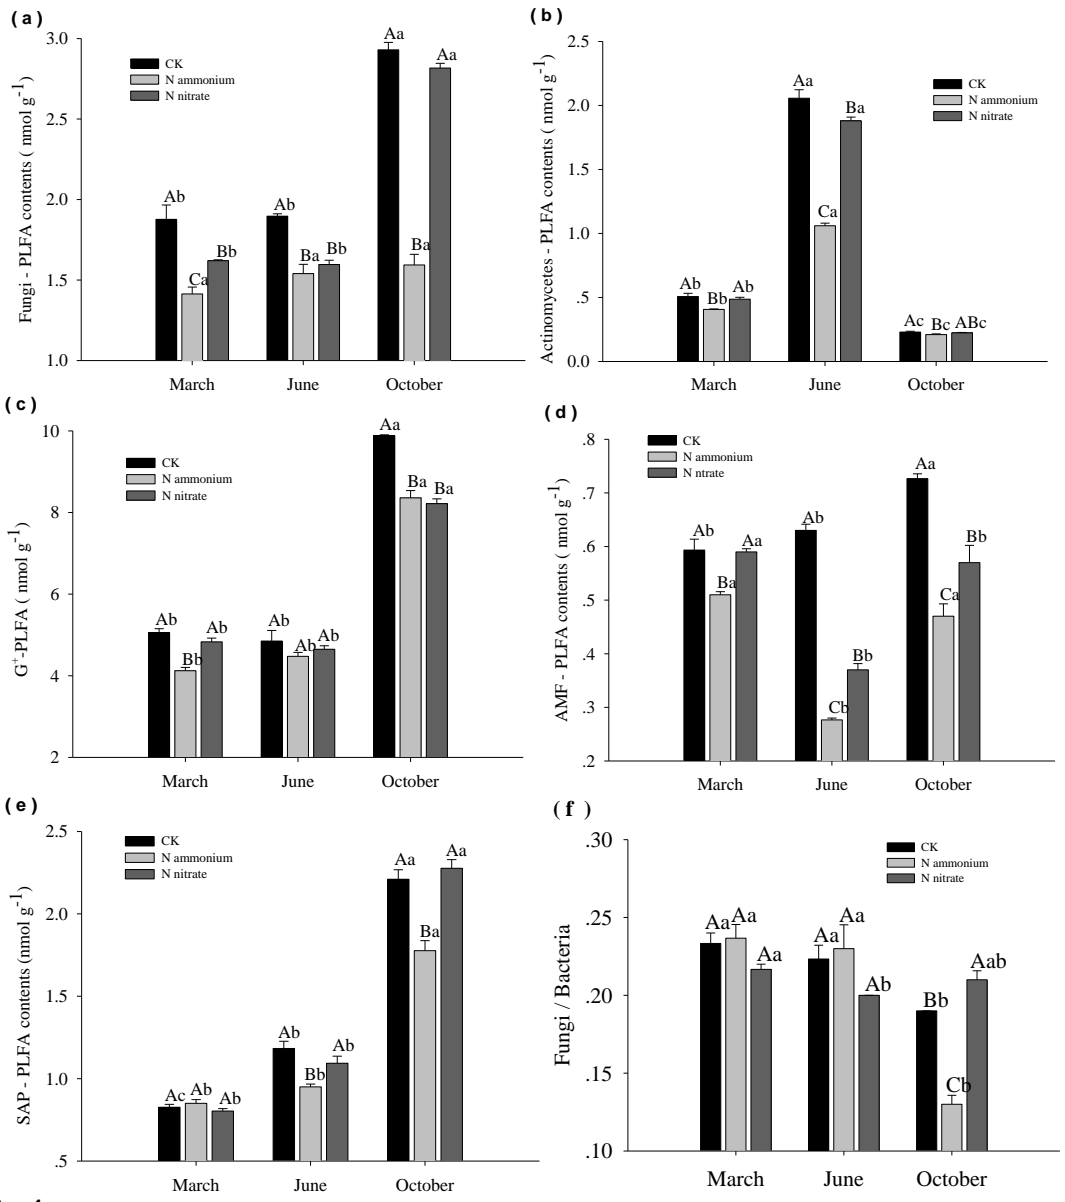

**Fig. 4**

563

564

565  
566

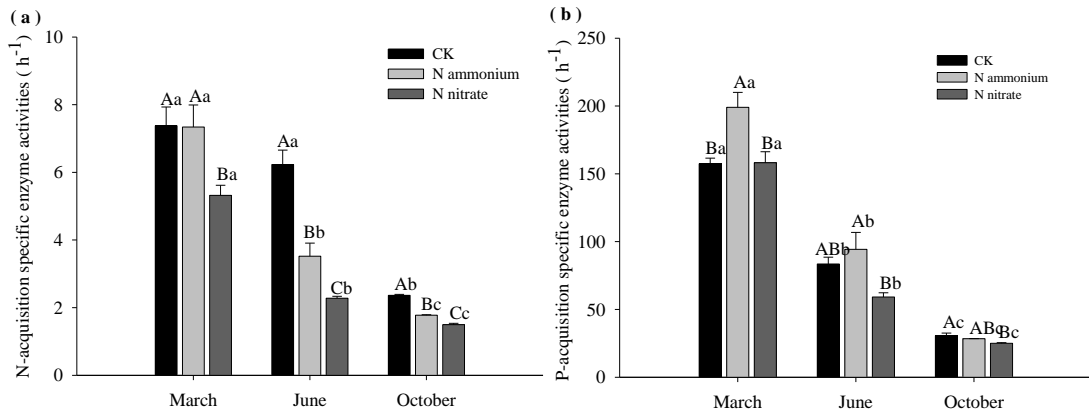

567  
568

**Fig.5**



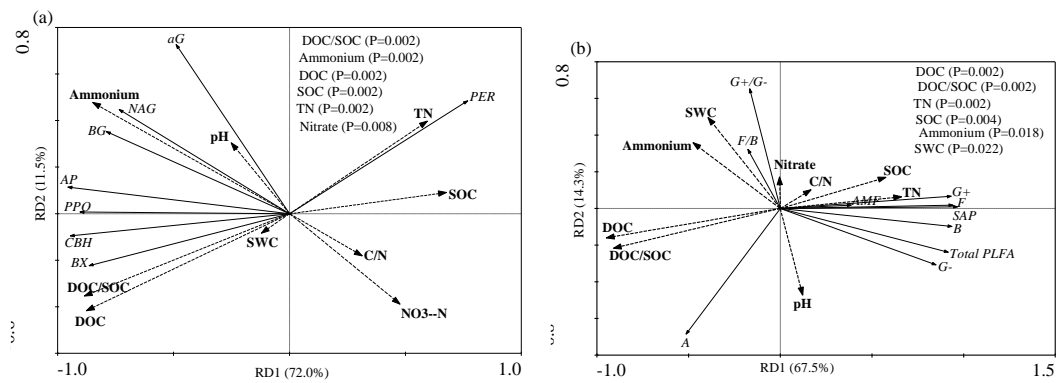

569

570 Fig. 6

571 **Table 1** Summary statistics (F ratio) for the two factor randomized block analysis of variance (ANOVA)  
 572 applied to soil variables, enzyme activities and PLFA biomarkers. The bold numbers are significant ( $P$   
 573  $< 0.05$ )

| Factors                        | Treatments     | Months         | Treatments $\times$ Months |
|--------------------------------|----------------|----------------|----------------------------|
| pH                             | <b>12.43</b>   | 0.31           | 0.09                       |
| DOC                            | <b>23.53</b>   | <b>561.25</b>  | <b>20.11</b>               |
| Nitrate                        | <b>43.19</b>   | <b>7.96</b>    | <b>8.21</b>                |
| Ammonium                       | <b>11.84</b>   | <b>65.46</b>   | 0.42                       |
| TPLFA                          | <b>102.51</b>  | <b>477.77</b>  | 2.68                       |
| B                              | <b>56.94</b>   | <b>555.14</b>  | 2.73                       |
| F                              | <b>180.49</b>  | <b>277.81</b>  | <b>52.16</b>               |
| A                              | <b>172.230</b> | <b>2627.61</b> | <b>123.12</b>              |
| G <sup>+</sup>                 | <b>50.30</b>   | <b>1221.19</b> | <b>14.39</b>               |
| G <sup>-</sup>                 | <b>34.33</b>   | <b>105.59</b>  | 0.45                       |
| AMF                            | <b>147.77</b>  | <b>83.55</b>   | <b>21.64</b>               |
| SAP                            | <b>24.70</b>   | <b>781.67</b>  | <b>13.08</b>               |
| G <sup>+</sup> /G <sup>-</sup> | <b>16.24</b>   | 2.38           | 0.94                       |
| F/B                            | <b>3.82</b>    | <b>56.42</b>   | <b>21.67</b>               |
| aG                             | <b>30.24</b>   | <b>53.17</b>   | <b>3.47</b>                |
| BG                             | <b>3.26</b>    | <b>72.90</b>   | 0.58                       |
| BX                             | <b>9.86</b>    | <b>79.08</b>   | <b>3.86</b>                |
| CBH                            | <b>28.51</b>   | <b>194.75</b>  | <b>4.39</b>                |
| NAG                            | <b>100.42</b>  | <b>67.49</b>   | <b>8.47</b>                |
| AP                             | <b>22.81</b>   | <b>467.77</b>  | 1.73                       |
| PPO                            | <b>6.87</b>    | <b>64.40</b>   | 1.98                       |
| PER                            | <b>6.27</b>    | <b>194.30</b>  | <b>3.07</b>                |
| C-acquisition specific enzyme  | 2.82           | <b>334.41</b>  | 2.07                       |
| N-acquisition specific enzyme  | <b>29.10</b>   | <b>128.31</b>  | <b>6.36</b>                |
| P-acquisition specific enzyme  | <b>13.42</b>   | <b>397.19</b>  | <b>4.53</b>                |
| Oxidase specific enzyme        | 1.68           | <b>89.04</b>   | 1.84                       |

574 **Table 2** Summary statistics (means  $\pm$  standard errors, n=3) for one way analyses of variance (ANOVA) and Duncan multiple  
 575 comparisons applied to soil absolute enzyme activities. Capital letters represent significant differences between the treatments ( $P$   
 576  $<0.05$ ), and small letters represent significant differences between the sampling events ( $P <0.05$ ).

| Months  | Treatments | aG<br>nmol g <sup>-1</sup><br>h <sup>-1</sup> | BG<br>nmol g <sup>-1</sup> h <sup>-1</sup> | BX<br>nmol g <sup>-1</sup> h <sup>-1</sup> | CBH<br>nmol g <sup>-1</sup><br>h <sup>-1</sup> | NAG<br>nmol g <sup>-1</sup><br>h <sup>-1</sup> | AP<br>nmol g <sup>-1</sup> h <sup>-1</sup> | PPO<br>$\mu$ mol g <sup>-1</sup><br>h <sup>-1</sup> | PER<br>$\mu$ mol g <sup>-1</sup><br>h <sup>-1</sup> |
|---------|------------|-----------------------------------------------|--------------------------------------------|--------------------------------------------|------------------------------------------------|------------------------------------------------|--------------------------------------------|-----------------------------------------------------|-----------------------------------------------------|
| March   | CK         | 7.0 $\pm$ 0.1Aa                               | 160.9 $\pm$ 15.6<br>Aa                     | 36.4 $\pm$ 3.4Aa                           | 30. $\pm$ 2.1A<br>a                            | 77.5 $\pm$ 4.7<br>Aa                           | 1658.7 $\pm$ 59.1<br>Aa                    | 7.9 $\pm$ 0.9Aa                                     | 1.4 $\pm$ 0.1<br>Ab                                 |
|         | N ammonium | 4.5 $\pm$ 0.2Ba                               | 143.5 $\pm$ 4.0A<br>a                      | 26.8 $\pm$ 3.2Aa                           | 27.3 $\pm$ 1.5<br>Aa                           | 56.1 $\pm$ 5.2<br>Ba                           | 1520.7 $\pm$ 78.2<br>Aa                    | 8.9 $\pm$ 0.0Aa                                     | 1.5 $\pm$ 0.1<br>Ab                                 |
|         | N nitrate  | 4.5 $\pm$ 0.2Ba                               | 157.1 $\pm$ 10.9<br>Aa                     | 33.4 $\pm$ 1.0Aa                           | 21.0 $\pm$ 0.8<br>Ba                           | 49.7 $\pm$ 2.6<br>Ba                           | 1475.2 $\pm$ 53.2<br>Aa                    | 9.9 $\pm$ 1.4Aa                                     | 1.6 $\pm$ 0.1<br>Ab                                 |
|         | CK         | 4.0 $\pm$ 0.9Ab<br>2.2 $\pm$ 0.1A             | 83.2 $\pm$ 13.0A<br>b                      | 37.2 $\pm$ 1.6Aa                           | 28.6 $\pm$ 2.5<br>Aa                           | 77.0 $\pm$ 4.7<br>Aa                           | 1030.3 $\pm$ 41.2<br>Ab                    | 7.7 $\pm$ 1.2Aa                                     | 1.4 $\pm$ 0.1<br>Ab                                 |
| June    | N ammonium | Bc                                            | 70.6 $\pm$ 0.9Ab<br>89.4 $\pm$ 10.3A       | 25.9 $\pm$ 1.8Ba                           | 17.9 $\pm$ 0.2<br>Bb                           | 31.8 $\pm$ 1.7<br>Bb                           | 848.5 $\pm$ 62.1B<br>b                     | 4.0 $\pm$ 0.0Bb                                     | 0.9 $\pm$ 0.1B<br>b                                 |
|         | N nitrate  | 1.7 $\pm$ 0.3Bb                               | b                                          | 28.7 $\pm$ 1.2Bb<br>15.2 $\pm$ 0.4A        | 19.8 $\pm$ 0.2<br>Ba                           | 25.7 $\pm$ 0.6<br>Bb                           | 667.8 $\pm$ 26.5C<br>b                     | 4.8 $\pm$ 0.9A<br>Bb                                | 1.2 $\pm$ 0.1<br>Ab                                 |
| October | CK         | 3.7 $\pm$ 0.4Ab                               | 89.1 $\pm$ 0.9Ab                           | Bb                                         | b                                              | Ab                                             | c                                          | 2.9 $\pm$ 0.2Ab                                     | Aa                                                  |
|         | N ammonium | 3.7 $\pm$ 0.1Ab                               | 64.0 $\pm$ 4.2Ab<br>68.3 $\pm$ 11.5A       | 16.2 $\pm$ 0.9Ab                           | 5.2 $\pm$ 0.1B<br>c                            | 26.5 $\pm$ 0.2<br>Bb                           | 423.4 $\pm$ 1.6Bc                          | 2.8 $\pm$ 0.1Ab                                     | 5.5 $\pm$ 0.8<br>Aa                                 |
|         | N nitrate  | 2.2 $\pm$ 0.0Bb                               | b                                          | 13.5 $\pm$ 0.1Bc                           | 5.3 $\pm$ 0.1B<br>b                            | 24.5 $\pm$ 0.2<br>Cb                           | 409.8 $\pm$ 4.7Bc                          | 1.9 $\pm$ 0.1Bc                                     | 5.6 $\pm$ 0.8<br>Aa                                 |

577

578 **Supplementary materials**

579

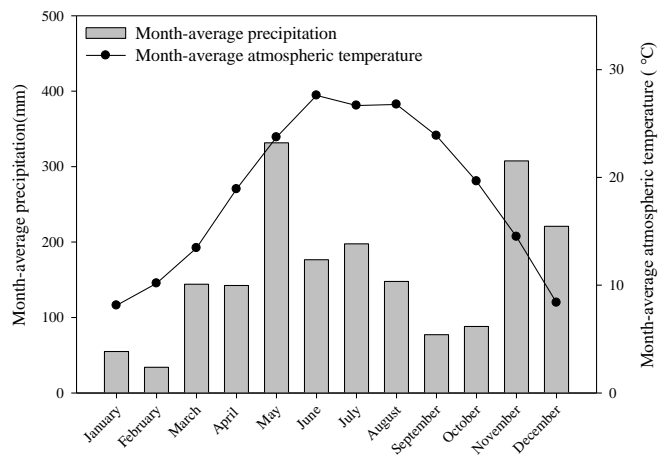

580

581 Fig S1. Average monthly atmospheric temperature and precipitation at the study site during 2015.

582 **Table S 1** Enzymes and their corresponding substrates and functions.

| Enzyme                               | Ec       | Abbrevia<br>tion | Substrate                                | Function                                                                                                                |
|--------------------------------------|----------|------------------|------------------------------------------|-------------------------------------------------------------------------------------------------------------------------|
| Peroxidase                           | 1.11.1.7 | PER              | L-DOPA                                   | Oxidize lignin and aromatic compounds using H <sub>2</sub> O <sub>2</sub> or secondary oxidants as an electron acceptor |
| Phenol oxidase                       | 1.10.3.2 | PPO              | L-DOPA                                   | Oxidize phenolic compounds using oxygen as an electron acceptor                                                         |
| $\alpha$ -1,4-glucosidase            | 3.2.1.20 | aG               | 4-MUB- $\alpha$ -D-glucoside             | Releases glucose from starch                                                                                            |
| $\beta$ -1,4-glucosidase             | 3.2.1.21 | BG               | 4-MUB- $\beta$ -D-glucoside              | Releases glucose from cellulose                                                                                         |
| Cellobiohydrolase                    | 3.2.1.91 | CBH              | 4-MUB- $\beta$ -D-cellobioside           | Releases disaccharides from cellulose                                                                                   |
| $\beta$ -1,4-xylosidase              | 3.2.1.37 | BX               | 4-MUB- $\beta$ -D-xyloside               | Releases xylose from hemicellulose                                                                                      |
| $\beta$ -1,4-N-acetylglucosaminidase | 3.2.1.14 | NAG              | 4-MUB-N-acetyl- $\beta$ -D-glucosaminide | Releases N-acetyl glucosamine from oligosaccharides                                                                     |
| Acid phosphatase                     | 3.1.3.1  | AP               | 4-MUB-phosphate                          | Releases phosphate groups                                                                                               |

583 **Table S2** Time-independent seasonal variations in ammonium and PLFAs. Small letters represent  
584 significant differences between the sampling time ( $P < 0.05$ ), error bars represent means  $\pm$  standard  
585 errors (n=9).

| Months  | Ammonium<br>mg kg <sup>-1</sup> | Total PLFA<br>nmol g <sup>-1</sup> | Bacteria<br>nmol g <sup>-1</sup> | G <sup>-</sup><br>nmol g <sup>-1</sup> |
|---------|---------------------------------|------------------------------------|----------------------------------|----------------------------------------|
| March   | 23.5 $\pm$ 1.0a                 | 9.2 $\pm$ 0.2c                     | 7.1 $\pm$ 0.2c                   | 2.5 $\pm$ 0.1c                         |
| June    | 10.6 $\pm$ 1.0b                 | 11.0 $\pm$ 0.2b                    | 7.7 $\pm$ 0.2b                   | 3.1 $\pm$ 0.1b                         |
| October | 7.5 $\pm$ 1.0b                  | 16.7 $\pm$ 0.2a                    | 13.8 $\pm$ 0.2a                  | 5.0 $\pm$ 0.1a                         |

586
